# Supplementary material for: AXL-initiated paracrine activation of pSTAT3 enhances mesenchymal and vasculogenic supportive features of tumor-associated macrophages
Source: PubMed Central journal article supplement — Cell Rep. Author manuscript; Available in PMC 2023 Oct 16. (PMC10577802; doi:10.1016/j.celrep.2023.113067), 2023-09-01
Supplement: NIHMS1933902-supplement-1.pdf [file NIHMS1933902-supplement-1.pdf]

**Supplemental information**

**AXL-initiated paracrine activation of pSTAT3  
enhances mesenchymal and vasculogenic supportive  
features of tumor-associated macrophages**

**Chia-Nung Hung, Meizhen Chen, Daniel T. DeArmond, Cheryl H.-L. Chiu, Catherine A. Limboy, Xi Tan, Meena Kusi, Chih-Wei Chou, Li-Ling Lin, Zhao Zhang, Chiou-Miin Wang, Chun-Liang Chen, Kohzoh Mitsuya, Pawel A. Osmulski, Maria E. Gaczynska, Nameer B. Kirma, Ratna K. Vadlamudi, Don L. Gibbons, Steve Warner, Andrew J. Brenner, Daruka Mahadevan, Joel E. Michalek, Tim H.-M. Huang, and Josephine A. Taverna**

# Figure S1 (related to Figure 1)

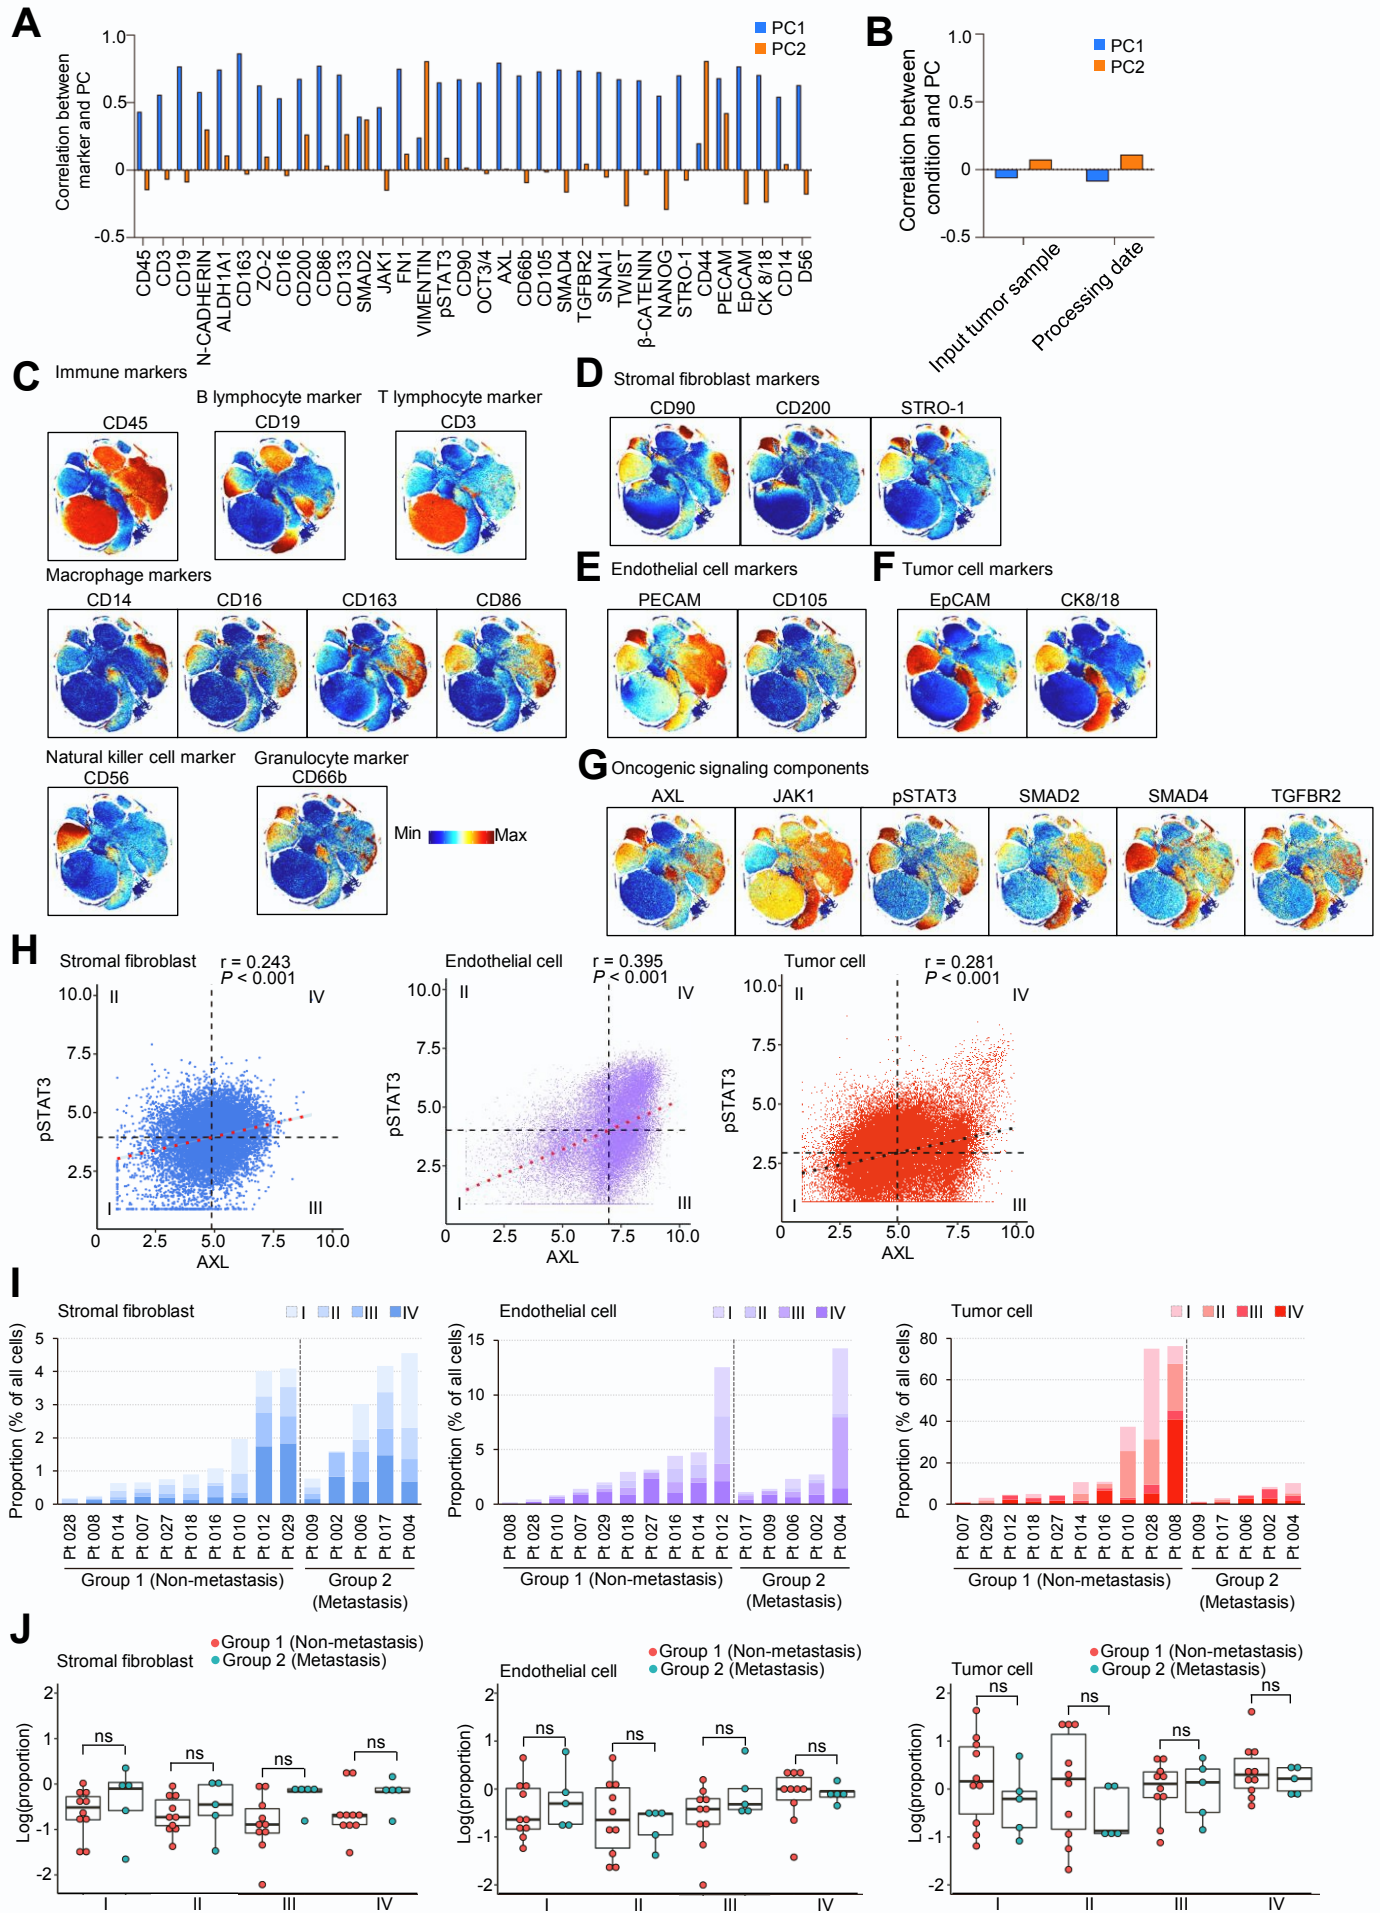

**Figure S1. Cytometry by time-of-flight (CyTOF) single cell expression profiles of 34 protein markers of the 15 treatment-naïve lung tumors (related to Fig. 1).**

(A) Bar graph of Spearman's correlation coefficients indicating all protein measurements from multiple CyTOF runs were highly correlated with the first two principal components (PCs) which in total explained 51% of the variance.

(B) Bar graph of Spearman's correlation coefficients between input tumor samples/processing dates and the first two PCs. Low correlations indicate minimal batch effect.

(C-F) t-distributed stochastic neighbor embedding (t-SNE) scatter plots of expression levels of surface markers for immune cells, stromal fibroblasts, and endothelial cells.

(G) t-SNE scatter plots of expression levels of oncogenic signaling markers.

(H) AXL and pSTAT3 correlation scatter plot of stromal fibroblasts, endothelial cells and tumor cells showing the four categories based on mean value of AXL and pSTAT3.  $P < 0.001$ .

(I) Bar graph of AXL-pSTAT3 category proportion of stromal fibroblasts, endothelial cells and tumor cells in individual patient. Group 1 and 2 tumors were classified based on TNM classification of individual patients. Group 1 tumors was non-metastatic patients and Group 2 tumors was patients with lymph node and/or distant metastasis. See also Supplementary Table S1.

(J) Box plot of category proportion of stromal fibroblasts, endothelial cells, and tumor cells between Group1 (n=10) and Group2 (n=5) tumors. Data are mean  $\pm$  SD; Student's t test for each category.

# Figure S2 (related to Figure 2)

## A EMT markers

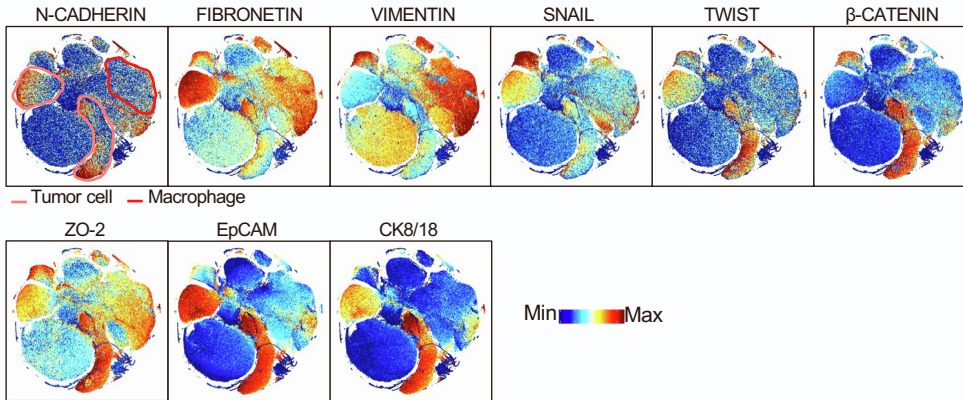

## B Lung tumor cell population

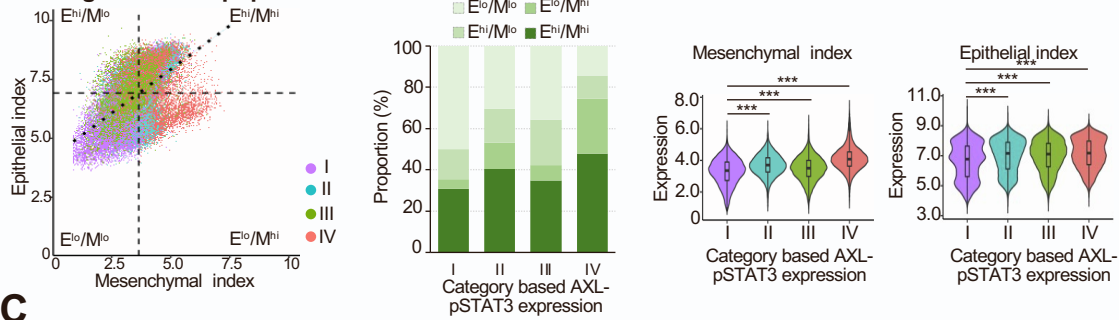

## C Stemness markers

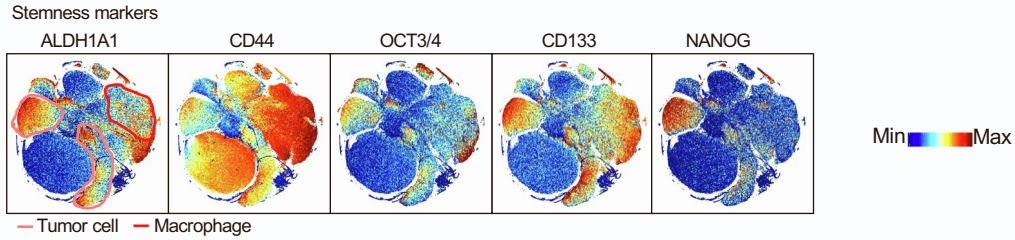

## D Lung tumor cell population

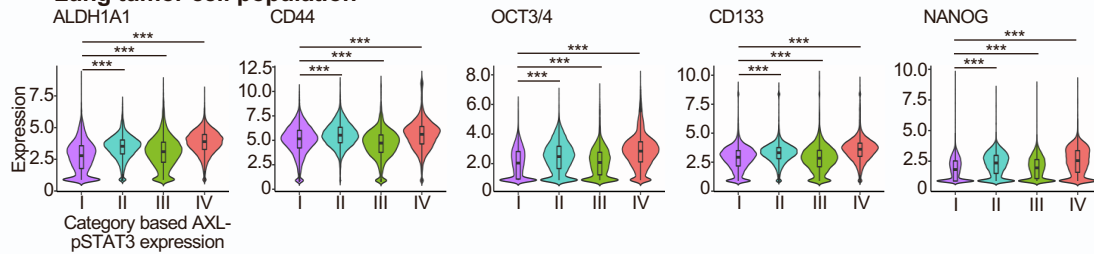

**Figure S2. Concordant AXL and STAT3 was associated with intermediate epithelial-mesenchymal transition (EMT) and stemness features in tumor cells from the 15 lung tumors (related to Fig. 2).**

(A) t-distributed stochastic neighbor embedding (t-SNE) scatter plots of expression levels of EMT markers.

(B) Mesenchymal index and epithelial index correlation scatter plot of tumor cells showing the four subtypes based on mean value of mesenchymal index and epithelial index.  $P < 0.001$ . Bar graph of subtype proportion in four AXL-pSTAT3 categories. Violin plots of expression level of mesenchymal index and epithelial index in four AXL-pSTAT3 categories. Data are mean  $\pm$  SD;  $***P < 0.001$ ; one-way ANOVA followed by Duncan's multiple range tests.

(C) t-SNE scatter plots of expression levels of stemness markers.

(D) Violin plots of expression level of stemness markers in four AXL-pSTAT3 categories. Data are mean  $\pm$  SD;  $***P < 0.001$ ; one-way ANOVA followed by Duncan's multiple range tests.

# Figure S3 (related to Figure 3)

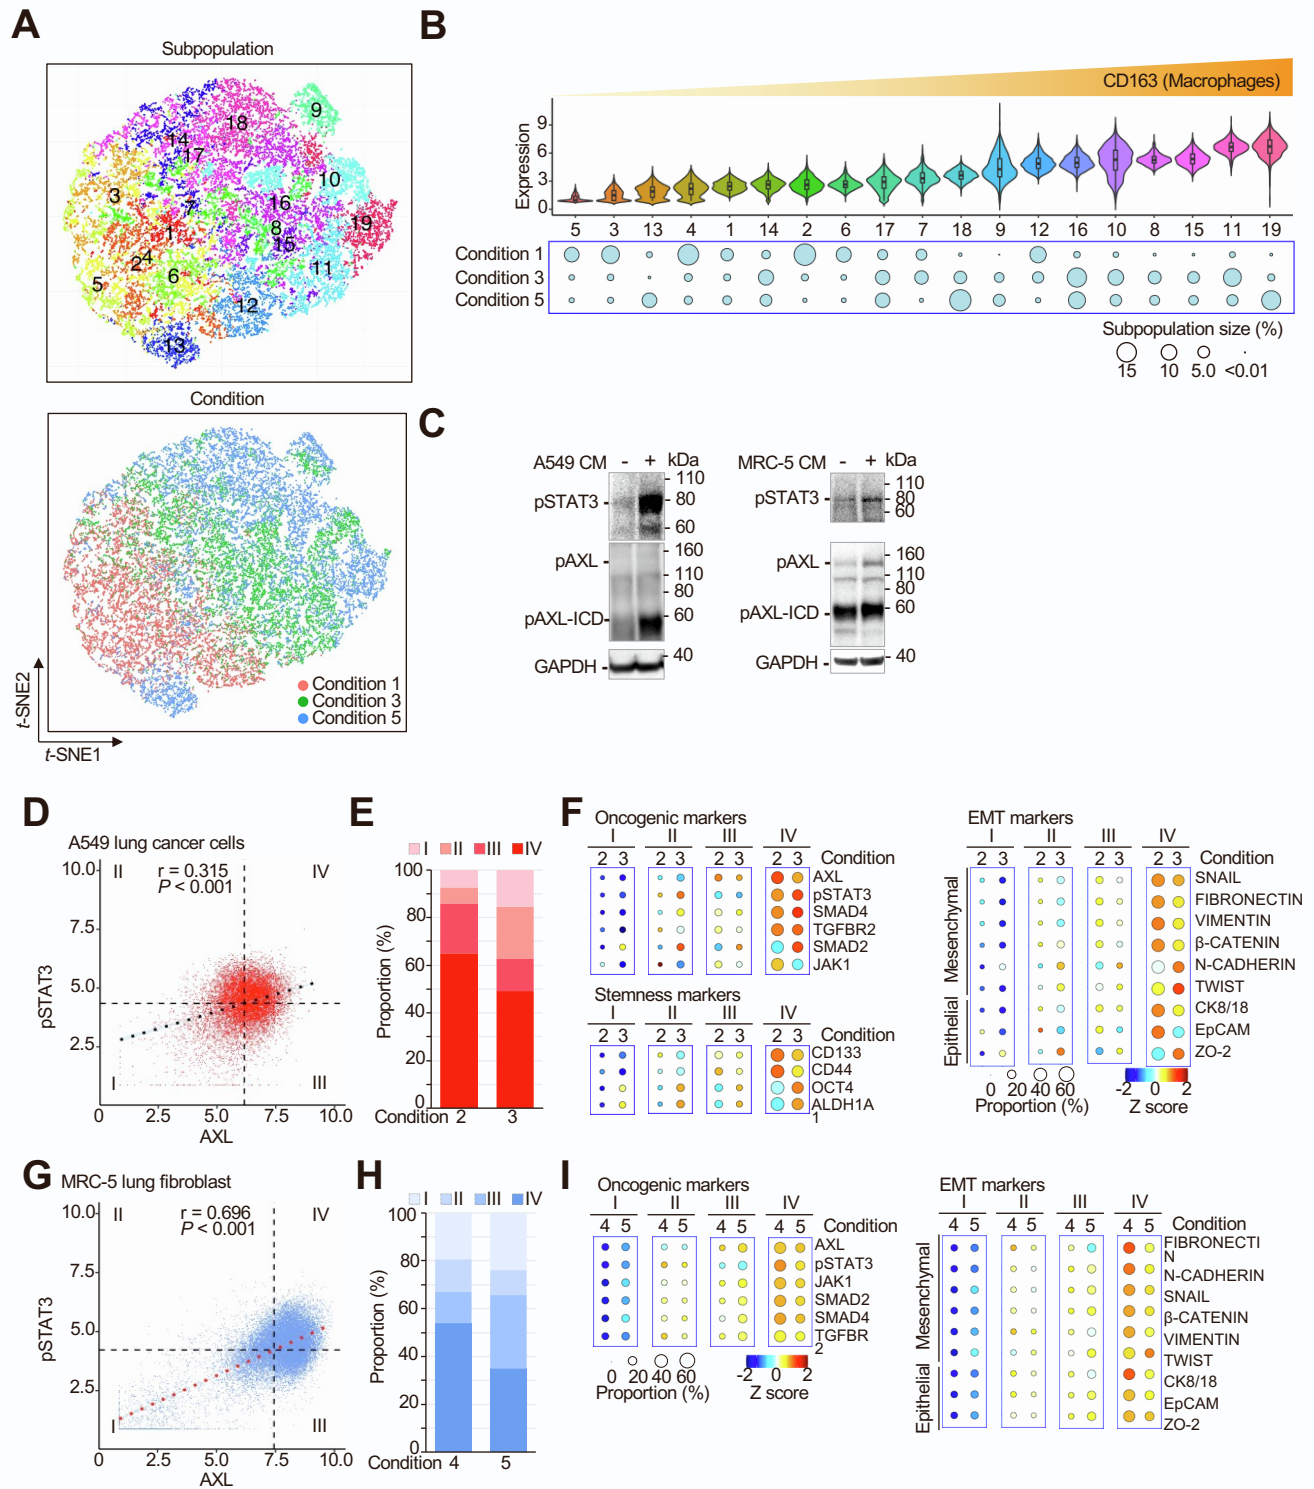

**Figure S3. M0 macrophages exerted reciprocal influences on co-cultured A549 cells and MRC-5 fibroblasts (related to Fig. 3).**

(A) t-distributed stochastic neighbor embedding (t-SNE) scatter plots of 19 subpopulations identified by PhenoGraph clustering algorithm in U937-derived macrophages of condition 1, 3 and 5.

(B) The 19 subpopulations of U937-derived macrophages of the 3 conditions were stratified based on increasing CD163 levels (violin plot).

(C) Western blots of phosphorylated AXL and STAT3 in U937-derived macrophages exposed to the conditioned medium of A549 lung cancer cells and MRC-5 lung fibroblasts.

(D) AXL and pSTAT3 correlation scatter plot of A549 lung cancer cells showing the four categories based on mean value of AXL and STAT3.  $P < 0.001$ .

(E) Bar graph of category proportion in condition 2 and 3.

(F) Circle plots showing the proportion and expression level of oncogenic, stemness and EMT markers of four AXL-pSTAT3 categories in A549 lung cancer cells from condition 2 and 3.

(G) AXL and pSTAT3 correlation scatter plot of MRC-5 lung fibroblasts showing the four categories based on mean value of AXL and STAT3.  $P < 0.001$ .

(H) Bar graph of category proportion in condition 4 and 5.

(I) Circle plots showing the proportion and expression level of oncogenic and EMT markers of four AXL-pSTAT3 categories in MRC-5 lung fibroblasts from condition 4 and 5.

# Figure S4 (related to Figure 4)

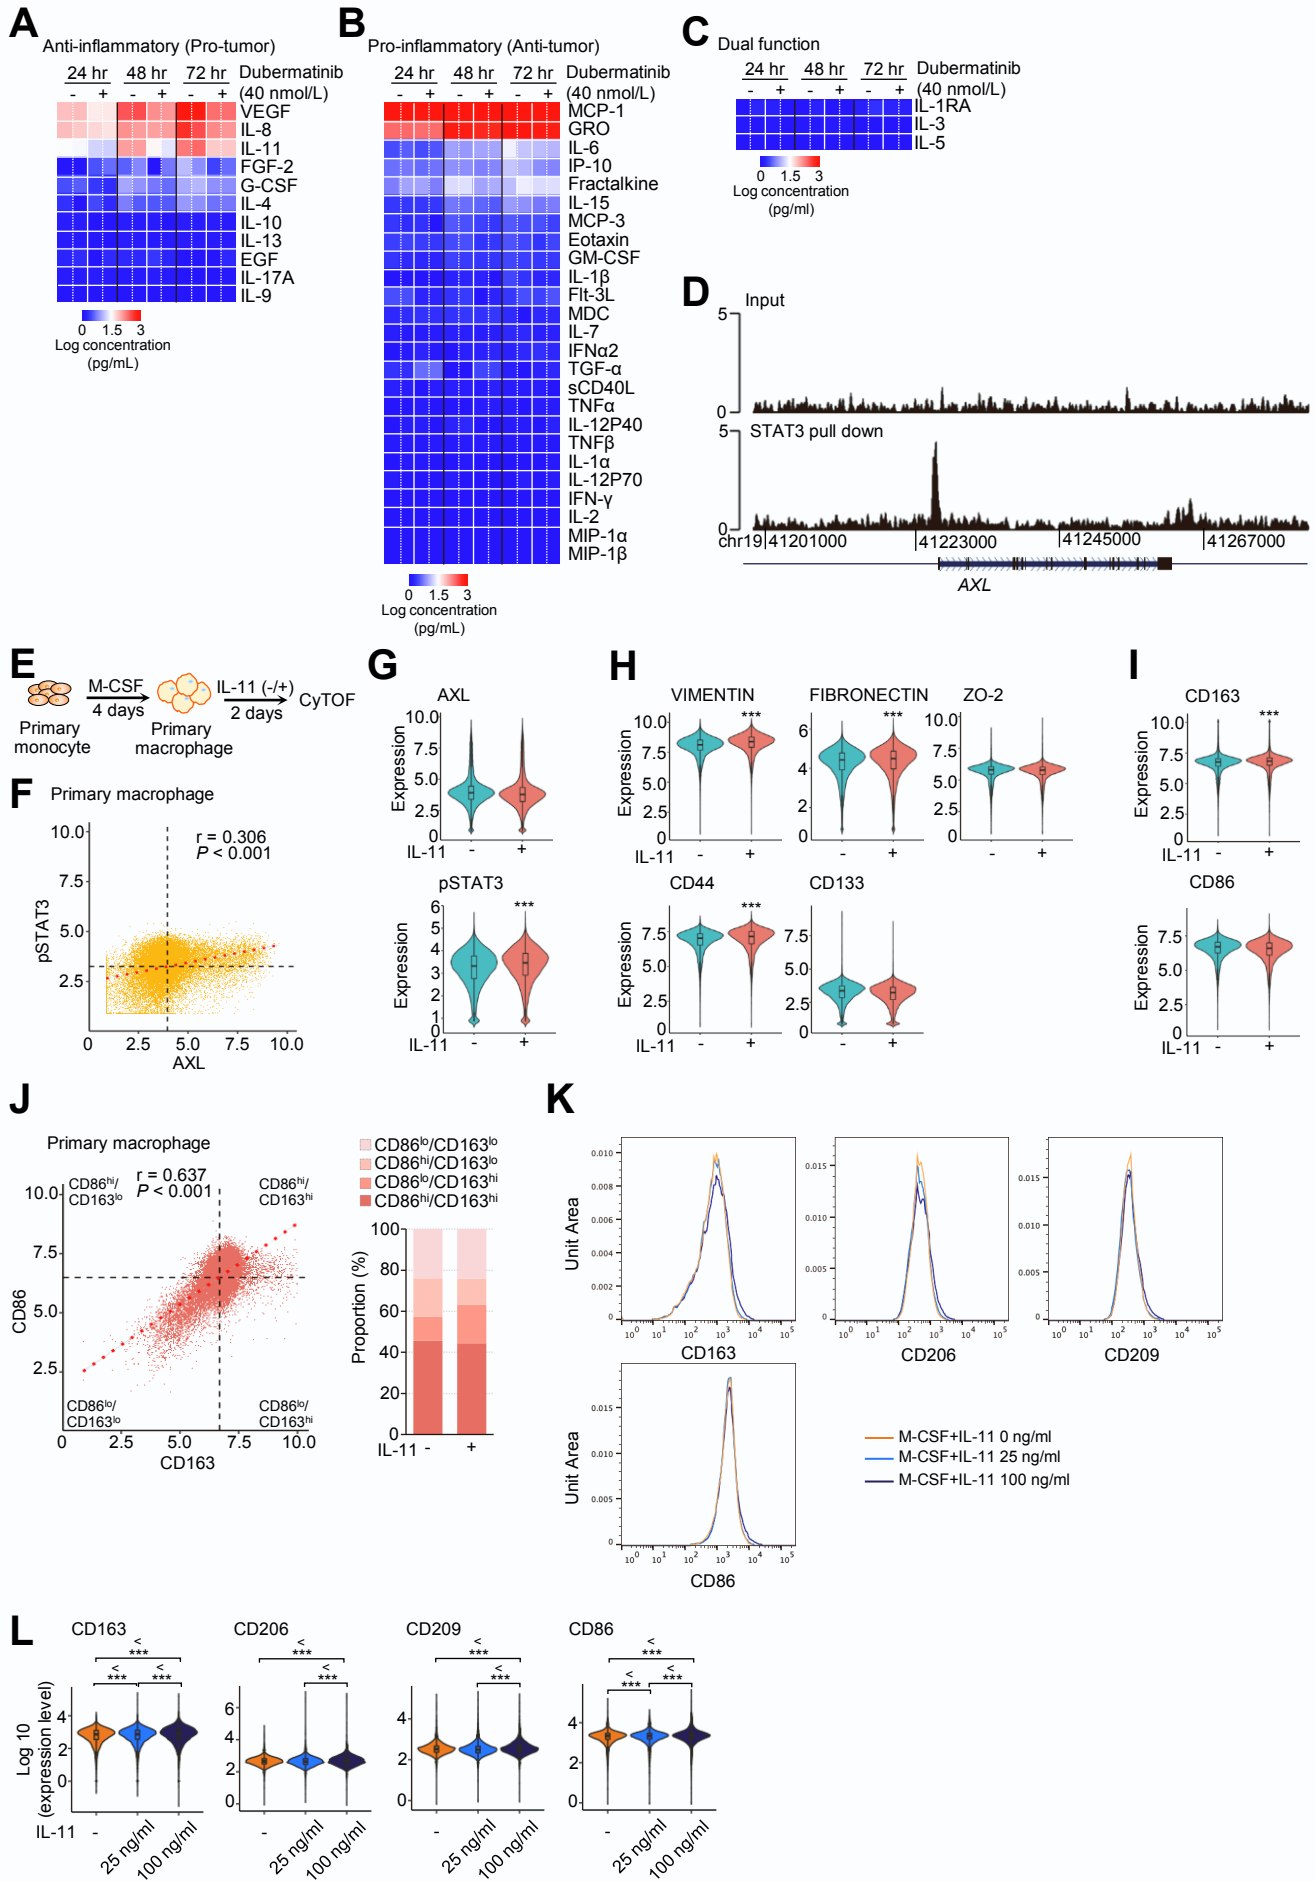



**Figure S4. IL-11 elevate the expression level of macrophage plasticity markers in primary macrophages (related to Fig. 4).**

(A-C) Expression heat maps of soluble factors and cytokines secreted from A549 lung cancer cells untreated and treated with AXL inhibitor, dabergatinib (40 nmol/L) for 24, 48 and 72 hr. IL-11 secretion by A549 cells was inhibited by dabergatinib.

(D) *In silico* analysis of anti-STAT3 ChIP-seq data indicates that anti-STAT3 immunoprecipitation enriched the promoter of *AXL*.

(E) Flow chart of primary macrophages induction and IL-11 treatment for CyTOF analysis.

(F) AXL and STAT3 correlation scatter plot of primary macrophages.

(G) Violin plots showing the expression level of AXL and STAT3 with and without IL-11 (25 ng/mL) exposure. Data are mean  $\pm$  SD; \*\*\* $P < 0.001$ ; Student's t test.

(H-I) Violin plots of expression level of seven macrophage plasticity associated markers with and without IL-11 (25 ng/mL) exposure. Data are mean  $\pm$  SD; \*\*\* $P < 0.001$ ; Student's t test.

(J) CD163 and CD86 correlation scatter plot of macrophage showing the four subtypes based on mean value of CD163 and CD86.  $P < 0.001$ . Bar graph of subtype proportion with and without IL-11 (25 ng/mL) exposure.

(K) Flow cytometry histogram of CD163, CD206, CD209, and CD86 expression in primary macrophages from four treatment groups, included no treatment, M-CSF treatment, M-CSF + IL-11 (25 ng/ml) treatment, and M-CSF + IL-11 (100 ng/ml) treatment.

(L) Violin plots of log<sub>10</sub> base expression level of CD163, CD206, CD209 and CD86 in primary macrophages from four treatment groups. Data are mean  $\pm$  SD; \*\*\* $P < 0.001$ ; one-way ANOVA followed by Duncan's multiple range tests.

# Figure S5 (related to Figure 4)

**A**

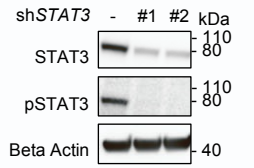

**B**

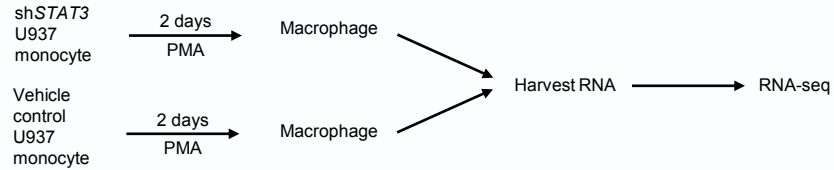

**C**

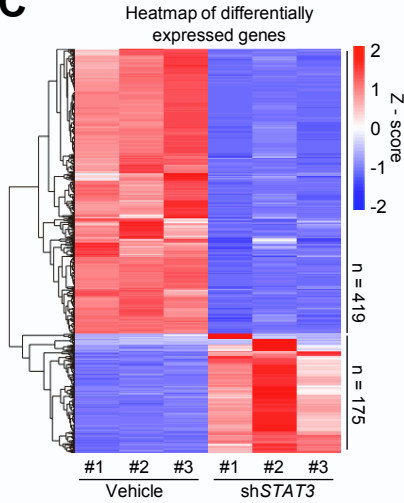

**D**

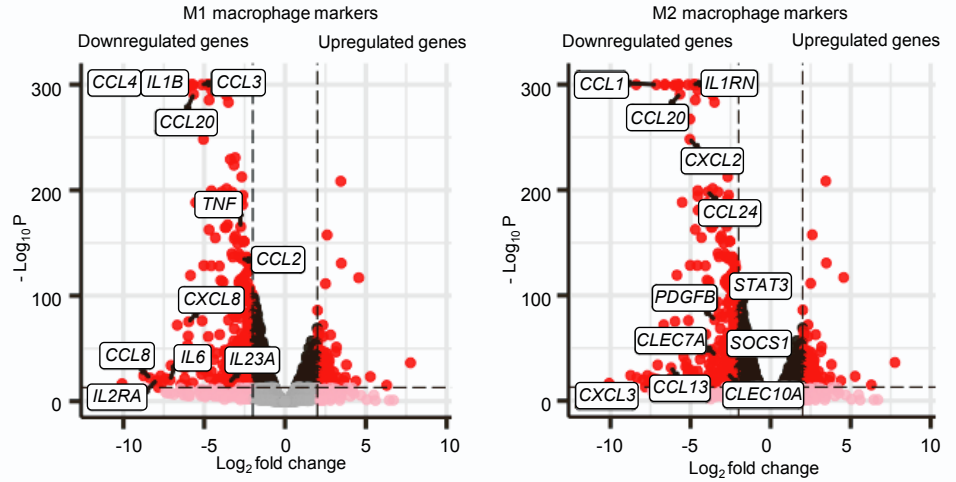

**E**

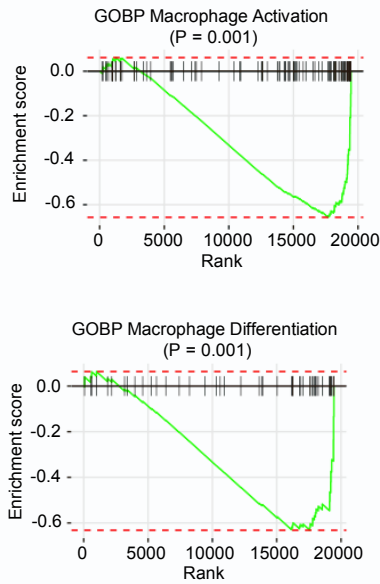

**F**

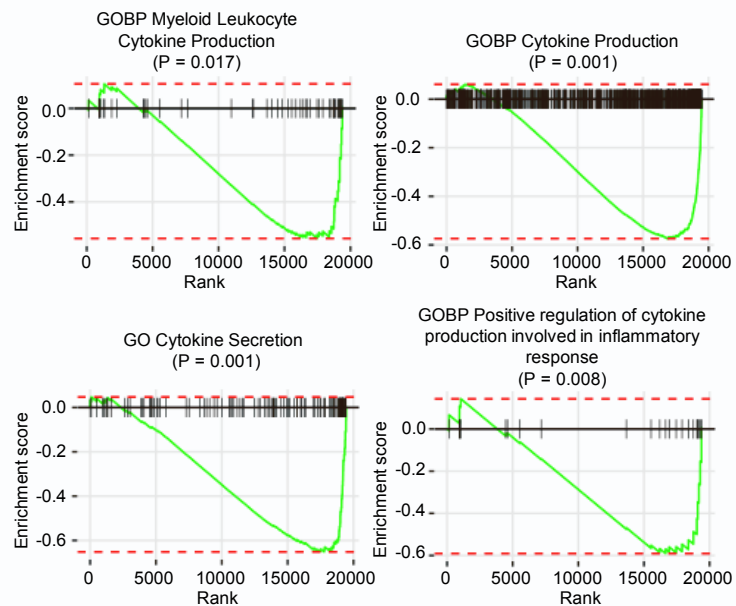

**Figure S5. Macrophage function, differentiation, and cytokine expression were attenuated in *STAT3* knockdown U937-derived macrophages.**

(A) Western blot analysis of *STAT3* and phosphorylated *STAT3* expression level in vehicle control and two clones of *STAT3* knockdown U937-derived macrophages.

(B) Flowchart of RNA-seq samples preparation.

(C) Heat map of differential expressed genes.

(D) Volcano plots illustrated down-regulation of M1 and M2 polarization markers.

(E-F) Gene set enrichment analysis (GSEA) reveal the attenuation of macrophage function, differentiation, and cytokine expression after *STAT3* knockdown.

# Figure S6 (related to Figure 5)

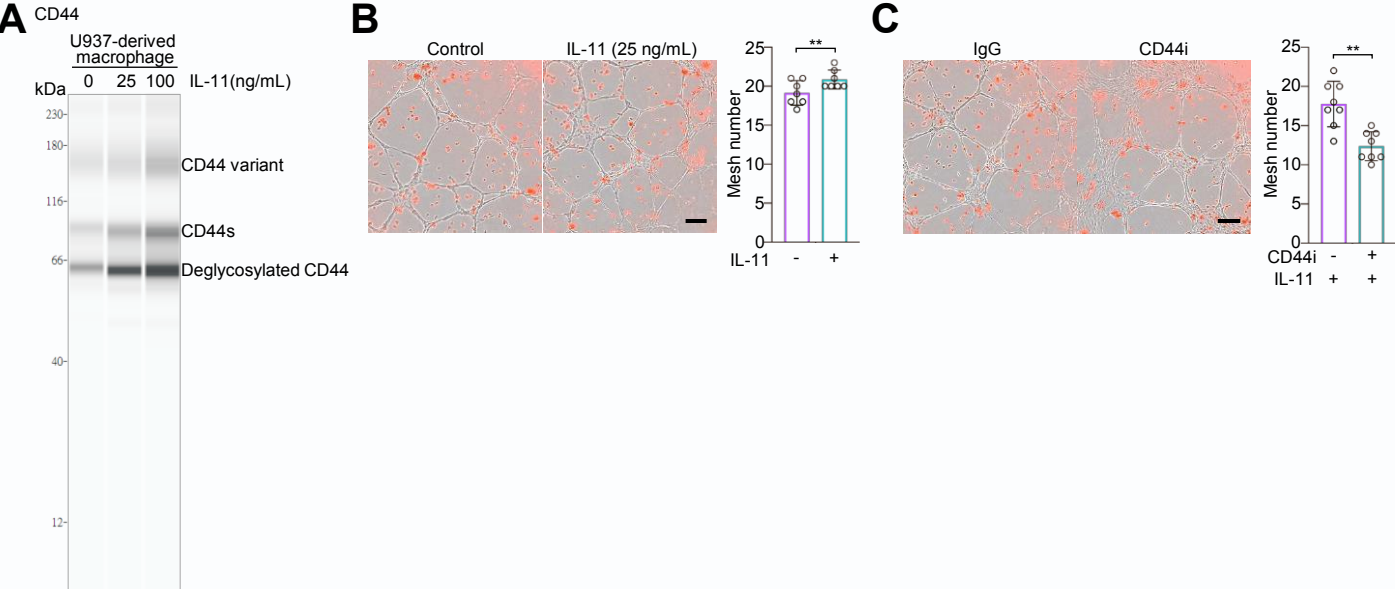

**Figure S6. Second batch of vasculogenic assay to reveal AXL-IL-11-STAT3-mediated CD44 enhances vascular mimicry of macrophages (related to Fig. 5).**

(A) Raw capillary Western immunoassay (WES) images of CD44 in U937-derived macrophages treated without or with IL-11 (25 ng/mL and 100 ng/mL).

(B) Bar graph of mesh number in HUVECs co-cultured with U937-derived macrophages pretreated with or without IL-11 (25 ng/ mL) (n=7). Data are mean  $\pm$  SD; \*\*  $P < 0.01$ ; Student's t test.

(C) Bar graph of mesh number in HUVECs co-cultured with U937-derived macrophages pretreated with IL-11 (25 ng/mL) and without or with CD44 inhibitor (n=8). Data are mean  $\pm$  SD; \*\*  $P < 0.01$ ; Student's t test.

# Figure S7 (related to Figure 6)

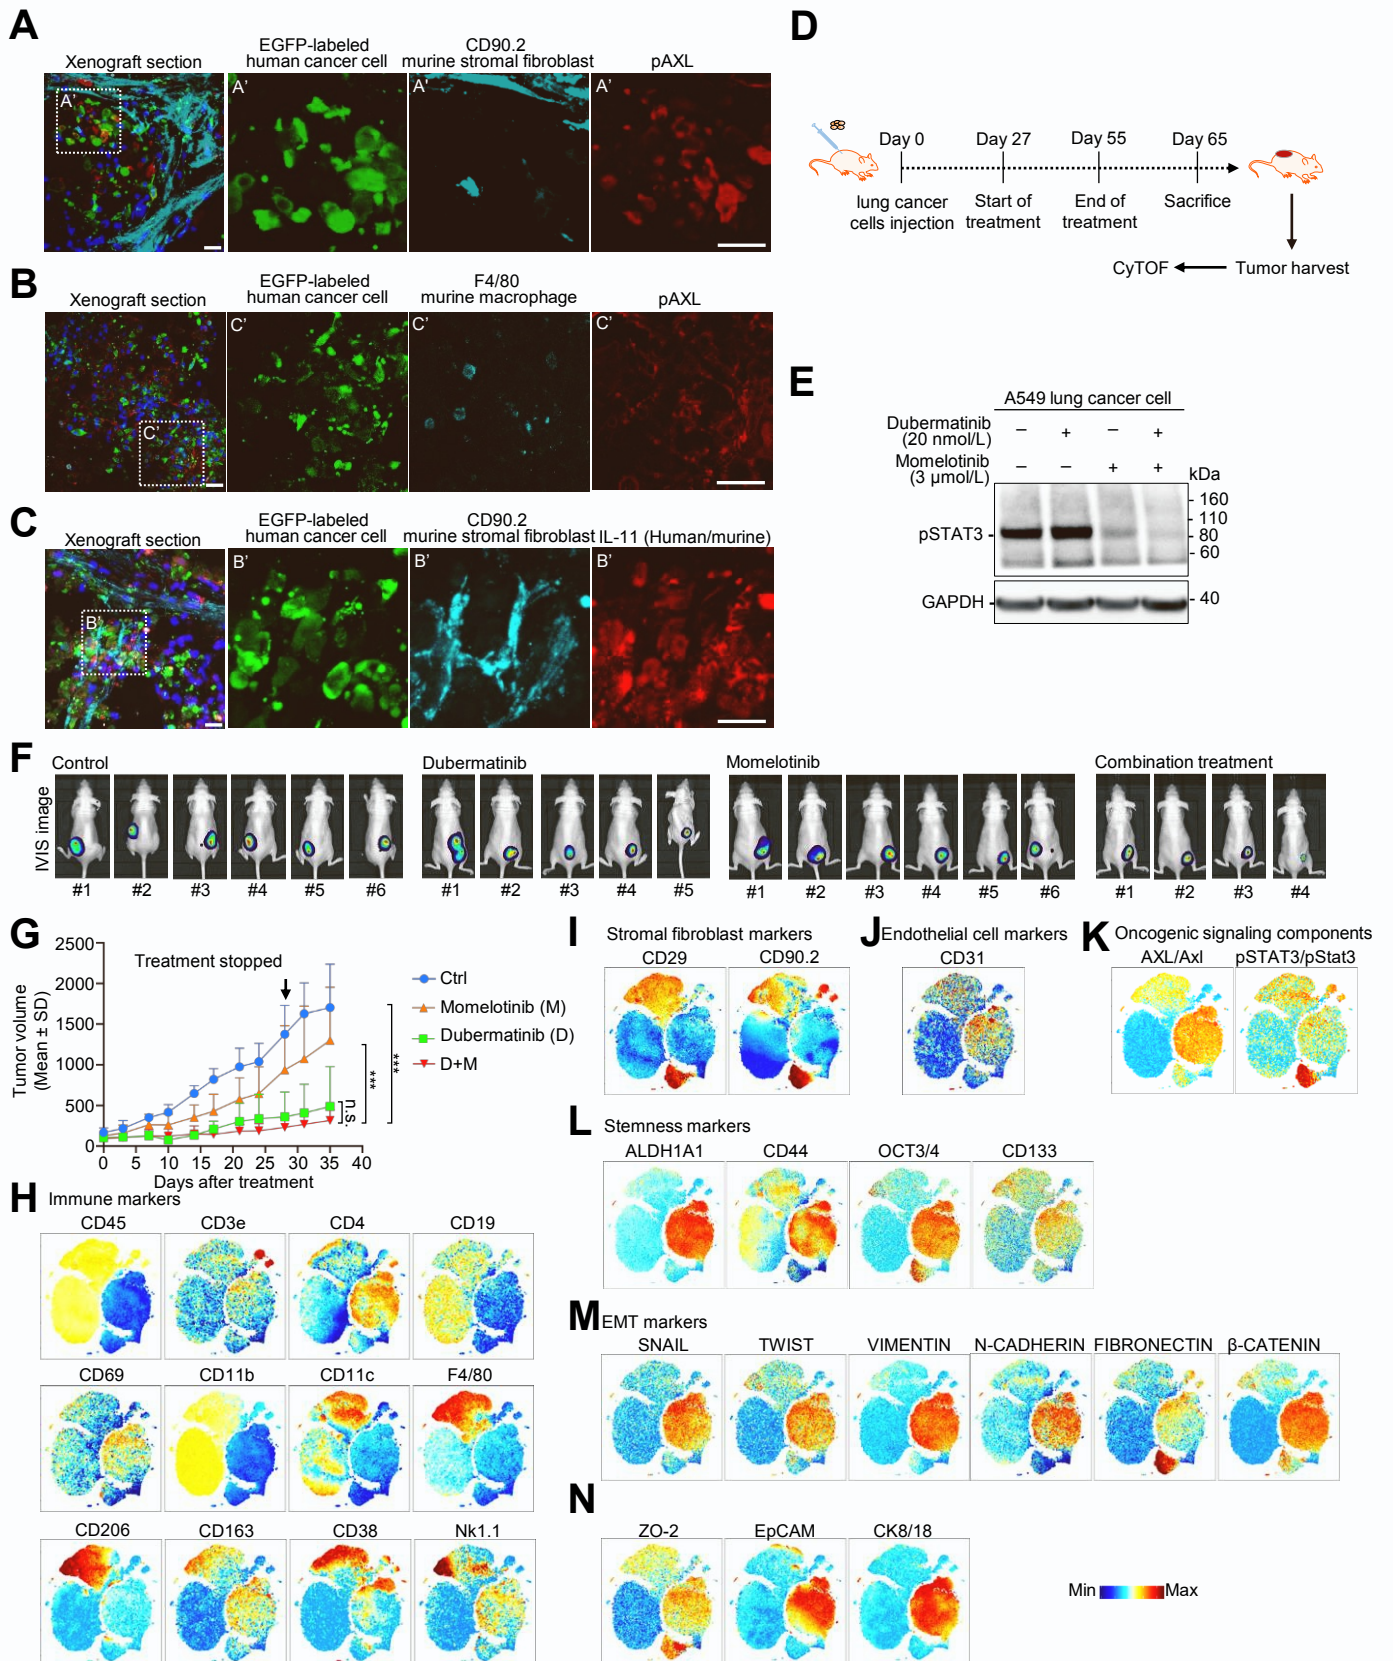

**Figure S7. Combined targeting of AXL and STAT3 attenuated xenograft tumor growth (related to Fig. 6).**

(A-C) Immunofluorescence images of xenograft tumor sections showing phosphorylated AXL and IL-11 expression among human cancer cells, murine macrophages, and murine stromal fibroblasts in the xenograft tumor microenvironment. Zoom-in images are shown in the right panels. Scale bar = 20  $\mu\text{m}$ .

(D) Experimental workflow of mouse xenograft models.

(E) Western blots of phosphorylated STAT3 in A549 lung cancer cells treated with duberminib and/or momelotinib.

(F) Representative bioluminescent images of tumor bearing mice taken on Day 65 prior to sacrifice and tumor harvest.

(G) Growth curves of the average tumor size in 4 treatment groups: control (n=6); duberminib 90 mg/kg oral dose twice weekly (n=6) x 28 days; momelotinib 25 mg/kg oral dose once daily x 28 days (n=6); combined treatment x 28 days (n=6). Combined treatment reduced tumor volumes 80% compared with control ( $***P < 0.001$ ). Duberminib dose decreased 20% to minimize toxicity. Data are mean  $\pm$  SD;  $***P < 0.001$ ; one-way ANOVA followed by Duncan's multiple range tests.

(H-J) t-SNE scatter plots of expression levels of markers for murine immune cells, murine stromal fibroblasts, and murine endothelial cells.

(K-N) t-SNE scatter plots of expression levels of oncogenic signaling, stemness and EMT markers.

# Figure S8 (related to Figure 6)

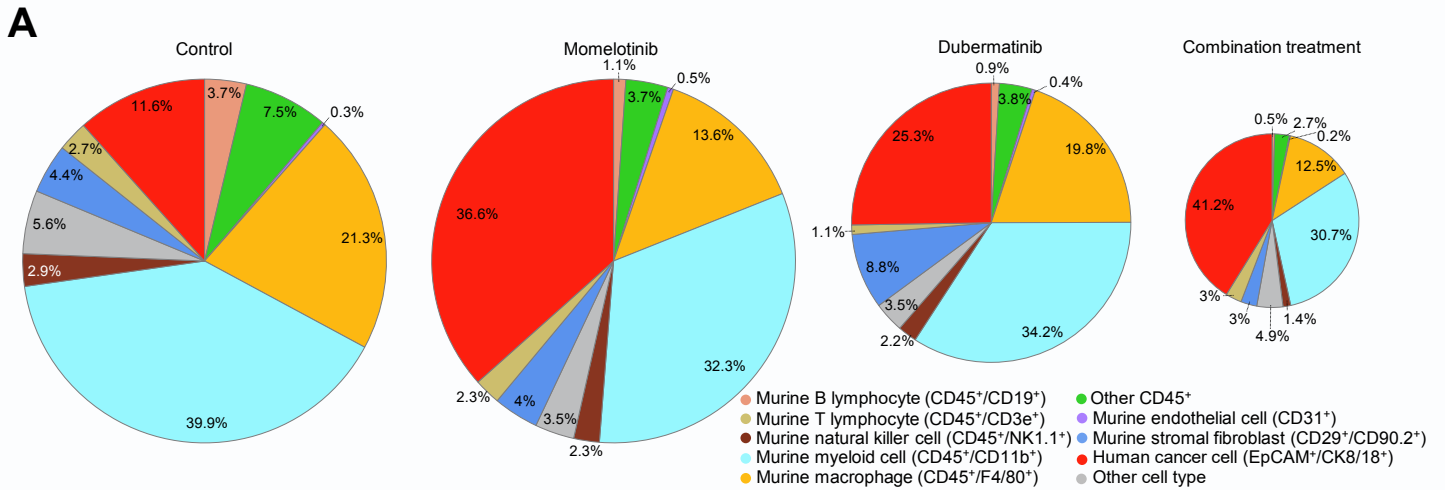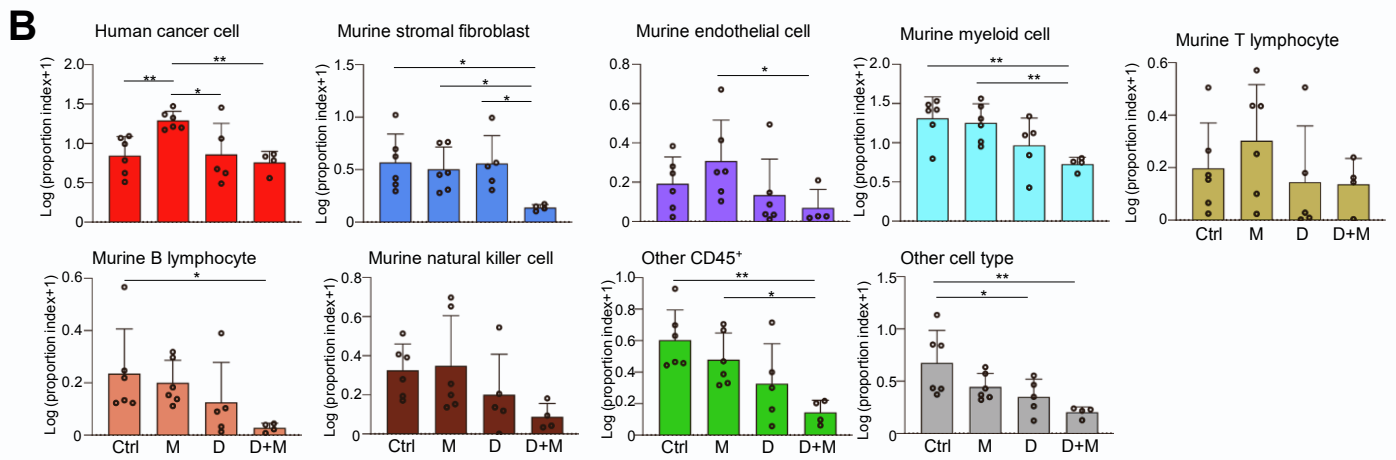



**Figure S8. Combined targeting of AXL and STAT3 reconfigures cellular composition and disrupts host cell conscription in xenograft tumor microenvironments (related to Fig. 6).**

(A) Pie charts of cell type proportion in the xenograft tumors of the four treatment groups.

(B) Bar graphs of nine cell type proportion index of the four treatments in log 10 base units (vehicle control (n=6), duberminib (n=5), momelotinib (n=6), and combination treatment (n=4)). Data are mean  $\pm$  SD; \* $P < 0.05$ ., \*\* $P < 0.01$ ; one-way ANOVA followed by Duncan's multiple range tests.

**Table S1.** Clinicopathological information of lung cancer patients

| Group | Patient ID | Age | Gender | Smoking status                                | Lung cancer type and specimen                      | Subtype                                                                                                            | Differentiation                   | TNM classification | Stage | Max tumor size | EGFR             | ALK      | ROS1     |
|-------|------------|-----|--------|-----------------------------------------------|----------------------------------------------------|--------------------------------------------------------------------------------------------------------------------|-----------------------------------|--------------------|-------|----------------|------------------|----------|----------|
| 2     | Pt 002     | 80  | F      | Former smoker, quit 25 years ago              | Adenocarcinoma (lymph node metastasis)             |                                                                                                                    |                                   | T1cN2M0            | IIIA  | 3 cm           |                  |          |          |
| 2     | Pt 004     | 74  | F      | Former smoker, 45 pack years                  | Invasive adenosquamous carcinoma (separate nodule) |                                                                                                                    |                                   | T3N2M0             | IIIB  | 2.1 cm         |                  |          |          |
| 2     | Pt 006     | 54  | F      | Nonsmoker                                     | Pleomorphic carcinoma with adenocarcinoma          |                                                                                                                    | Poor                              | T1cN1M0            | IIB   | 2.1 cm         | Exon 19 deletion | Negative | Negative |
| 1     | Pt 007     | 68  | M      | Current, 75 pack years                        | Adenocarcinoma                                     | Acinar pattern                                                                                                     |                                   | T2aN0M0            | IB    | 3 cm           | Negative         | Negative | Negative |
| 1     | Pt 008     | 79  | M      | Current, 100 pack years                       | Invasive adenocarcinoma                            | Papillary and hepatoid                                                                                             |                                   | T2aN0M0            | IB    | 3 cm           |                  |          |          |
| 2     | Pt 009     | 82  | F      | Former smoker, 50 pack years                  | Invasive adenocarcinoma                            | Lepidic, solid and glandular                                                                                       | Moderate                          | T1cN2M0            | IIIA  | 3.6 cm         |                  |          | Negative |
| 1     | Pt 010     | 57  | F      | Current, 45 pack years                        | Adenocarcinoma                                     | Micropapillary, papillary and acinar                                                                               | Moderate                          | T1bN0M0            | IA    | 3.2cm          |                  |          |          |
| 1     | Pt 012     | 82  | F      | Former smoker, 60 pack years                  | Invasive adenocarcinoma                            | Acinar predominant with micropapillary pattern and colloid features                                                |                                   | T1aN0M0            | IA    | 2.1 cm         | Negative         | Negative | Negative |
| 1     | Pt 014     | 75  | F      | Nonsmoker                                     | Invasive adenocarcinoma                            | Acinar predominant                                                                                                 |                                   | T1bN0M0            | IA    | 2 cm           | Exon 19 deletion |          |          |
| 1     | Pt 016     | 73  | M      | Former smoker, 40 pack years                  | Invasive adenocarcinoma                            | Papillary predominant                                                                                              |                                   | T2aN0M0            | IB    | 1 cm           |                  |          |          |
| 2     | Pt 017     | 74  | F      | Nonsmoker                                     | Invasive adenocarcinoma (pleural metastasis)       |                                                                                                                    | Well to moderate                  | T2bN0M1b           | IV    | 4.1cm          | Exon 19 deletion | Negative | Negative |
| 1     | Pt 018     | 72  | F      | Former smoker, 17 pack years                  | Invasive Adenocarcinoma                            |                                                                                                                    |                                   | T1bN0M0            | IA2   | 1.6 cm         |                  |          |          |
| 1     | Pt 027     | 60  | F      | Smoked as teenager (40 years without smoking) | Invasive adenocarcinoma                            | Acinar predominant with a lepidic pattern also present                                                             | well to moderately differentiated | pT1bN0M0           | IA2   | 1.2cm          |                  |          |          |
| 1     | Pt 028     | 75  | M      | 60 pack years                                 | Invasive adenocarcinoma                            | Acinar predominant with papillary (40%)                                                                            | well differentiated               | T3N0M0             | IIB   | 6.2 cm         | Negative         | Negative | Negative |
| 1     | Pt 029     | 60  | M      | Current, 44 pack years                        | invasive squamous cell carcinoma                   | Focal keratinization; separate tumor nodules of same histopathologic type (intrapulmonary metastasis in same lobe) |                                   | pT3N0M0            | IIIA  | 1.6cm          | Negative         | Negative | Negative |

**Table S2.** Antibody panel of cytometry by time-of-flight (CyTOF) for primary tumors and co-cultured cells

| Metal tag | Antigen          | Clone     | Vendor                  | Cat. No.     | Marker type            |
|-----------|------------------|-----------|-------------------------|--------------|------------------------|
| 89Yb      | CD45             | H130      | Fluidigm                | 3089003B     | Immune marker          |
| 141Pr     | CD3              | UCHT1     | Fluidigm                | 3141019B     | Immune marker          |
| 142Nd     | CD19             | HIB19     | Fluidigm                | 3142001B     | Immune marker          |
| 145Nd     | CD163            | GHI/61    | Fluidigm                | 3145010B     | Immune marker          |
| 148Nd     | CD16             | 3G8       | Fluidigm                | 3148004B     | Immune marker          |
| 175Lu     | CD14             | M5E2      | Fluidigm                | 3175015B     | Immune marker          |
| 176Yb     | CD56             | CMSSB     | Fluidigm                | 3176003B     | Immune marker          |
| 150Ne     | CD86             | IT2.2     | Fluidigm                | 3150020B     | Immune marker          |
| 162Dy     | CD66b            | 80H3      | Fluidigm                | 3162023B     | Immune marker          |
| 149Sm     | CD200            | OX104     | Fluidigm                | 3149007B     | Stromal marker         |
| 159Tb     | CD90             | 5E10      | Fluidigm                | 3159007B     | Stromal marker         |
| 170Er     | STRO-1           | STRO-1    | R&D Systems             | MAB1038      | Stromal marker         |
| 163Dy     | CD105            | 43A3      | Fluidigm                | 3163005B     | Endothelial marker     |
| 172Yb     | PECAM            | HEC7      | ThermoFisher Scientific | MA3100       | Endothelial marker     |
| 173Yb     | EPCAM            |           | R&D systems             | AF960        | EMT, epithelial marker |
| 174Yb     | Keratin 8/18     | C51       | Fluidigm                | 3174014A     | EMT, epithelial marker |
| 143Nd     | N-Cadherin       |           | R&D systems             | AF6426       | EMT                    |
| 146Nd     | ZO-2             | 3E8D9     | ThermoFisher Scientific | 374700       | EMT                    |
| 155Gd     | Fibronectin      | 2F4       | ThermoFisher Scientific | MA517075     | EMT                    |
| 156Gd     | Vimentin         |           | R&D systems             | MAB2105      | EMT                    |
| 166Er     | SNAI1            |           | Sigma                   | SAB 2108482  | EMT                    |
| 167Er     | TWIST1           | 927403    | R&D systems             | MAB6230      | EMT                    |
| 144Nd     | ALDH1A1          | 703410    | R&D Systems             | MAB5869      | Stemness               |
| 151Eu     | CD133            | 170411    | R&D Systems             | MAB11331-100 | Stemness               |
| 160Gd     | OCT3/4           | 240408    | R&D Systems             | MAB1759      | Stemness               |
| 169Tm     | Nanog            | N31355    | Fluidigm                | 3169014A     | Stemness               |
| 171Yb     | CD44             | IM7       | Fluidigm                | 3171003B     | Stemness               |
| 161Dy     | AXL              |           | R&D systems             | AF154        | Signaling              |
| 158Gd     | pSTAT3           | 4/p-stat3 | Fluidigm                | 3158005A     | Signaling              |
| 165Ho     | TGFBR2           |           | R&D Systems             | AF-241       | Signaling              |
| 152Sm     | SMAD2            | 31H15L4   | ThermoFisher Scientific | 700048       | Signaling              |
| 164Dy     | SMAD4            | 253343    | R&D Systems             | MAB2097      | Signaling              |
| 165Ho     | TGFBR2           |           | R&D Systems             | AF-241       | Signaling              |
| 168Er     | $\beta$ -catenin | 196624    | R&D systems             | MAB13292     | Signaling              |

**Table S3.** Antibody panel of cytometry by time-of-flight (CyTOF) for xenograft tumors

| Metal tag | Antigen          | Clone     | Vendor                  | Cat. No.     | Marker type              |
|-----------|------------------|-----------|-------------------------|--------------|--------------------------|
| 148Nd     | CD45             | 3G8       | Fluidigm                | 3148004B     | Immune marker            |
| 152Sm     | CD3e             |           | Fluidigm                | 3152004B     | Immune marker            |
| 172Yb     | CD4              |           | Fluidigm                | 3172003B     | Immune marker            |
| 142Nd     | CD11c            |           | Fluidigm                | 3142003B     | Immune marker            |
| 145Nd     | CD69             | GHI/61    | Fluidigm                | 3145010B     | Immune marker            |
| 146Nd     | F4/80            |           | Fluidigm                | 3146008B     | Immune marker            |
| 149Sm     | CD11b            | OX104     | Fluidigm                | 3149007B     | Immune marker            |
| 162Dy     | CD163            |           | abcam                   | ab182422     | Immune marker            |
| 175Lu     | CD38             |           | Fluidigm                | 3175014B     | Immune marker            |
| 169Tm     | CD206            |           | Fluidigm                | 3169021B     | Immune marker            |
| 170Er     | NK1.1            |           | Fluidigm                | 3170002B     | Immune marker            |
| 165Ho     | CD31             |           | Fluidigm                | 3165013B     | Mouse endothelial marker |
| 156Gd     | CD90.2           |           | Fluidigm                | 3156006B     | Murine stromal marker    |
| 111Cd     | CD29             |           | Novus Biologicals       | AF2405       | Murine stromal marker    |
| 173Yb     | EPCAM            |           | R&D systems             | AF960        | EMT, epithelial marker   |
| 174Yb     | Keratin 8/18     | C51       | Fluidigm                | 3174014A     | EMT, epithelial marker   |
| 112Cd     | ZO-2             | 3E8D9     | ThermoFisher Scientific | 374700       | EMT                      |
| 141Pr     | VIMENTIN         |           | R&D systems             | MAB2105      | EMT                      |
| 143Nd     | N-Cadherin       |           | R&D systems             | AF6426       | EMT                      |
| 155Gd     | Fibronectin      | 2F4       | ThermoFisher Scientific | MA517075     | EMT                      |
| 166Er     | SNAI1            |           | Sigma                   | SAB 2108482  | EMT                      |
| 167Er     | TWIST1           | 927403    | R&D systems             | MAB6230      | EMT                      |
| 144Nd     | ALDH1A1          | 703410    | R&D Systems             | MAB5869      | Stemness                 |
| 151Eu     | CD133            | 170411    | R&D Systems             | MAB11331-100 | Stemness                 |
| 160Gd     | OCT3/4           | 240408    | R&D Systems             | MAB1759      | Stemness                 |
| 171Yb     | CD44             | IM7       | Fluidigm                | 3171003B     | Stemness                 |
| 153Eu     | JAK1             | 413104    | R&D Systems             | MAB4260      | Signaling                |
| 158Gd     | pSTAT3           | 4/p-stat3 | Fluidigm                | 3158005A     | Signaling                |
| 161Dy     | AXL              |           | R&D systems             | AF154        | Signaling                |
| 168Er     | $\beta$ -catenin | 196624    | R&D systems             | MAB13292     | Signaling                |

**Table S4.** Clustering parameters of PhenoGraph clustering algorithm

| Figure    | Clustering parameters                                                                                                   |
|-----------|-------------------------------------------------------------------------------------------------------------------------|
| Figure 1B | CD45, CD3, CD19, CD163, CD16, CD200, CD86, CD90, CD66b, CD105, STRO-1, PECAM, EpCAM, CK8/18, CD14, CD56                 |
| Figure 6C | CD29, CD11c, CD69, F4-80, CD45, CD11b, CD19, CD3e, TER-119, CD90.2, CD163, CD31, CD206, NK1.1, CD4, EpCAM, CK8/18, CD38 |

**Table S5.** Primer sequences of Chromatin Immunoprecipitation (ChIP)-qPCR

| Gene        | Sequences 5'            | Sequences 3'        |
|-------------|-------------------------|---------------------|
| <i>CD44</i> | ACAAC TAAGAAGCAGCCATAAT | AGTAAGTCATCCACAGGCA |

**Table S6.** Primer sequences of Reverse Transcription (RT)-qPCR

| Gene        | Sequences 5'             | Sequences 3'       |
|-------------|--------------------------|--------------------|
| <i>CD44</i> | CTTTGTGGCATT TATTCATCAGT | CCATTTAACAGGAGCCGT |
